# Supplementary material for: Demographic and Disease-Related Predictors of Socioemotional Development in Children with Neurofibromatosis Type 1 and Plexiform Neurofibromas: An Exploratory Study
Source: MDPI journal article supplement (doi:10.3390/cancers14235956), 2022-12-01
Supplement: s1 [file s1]

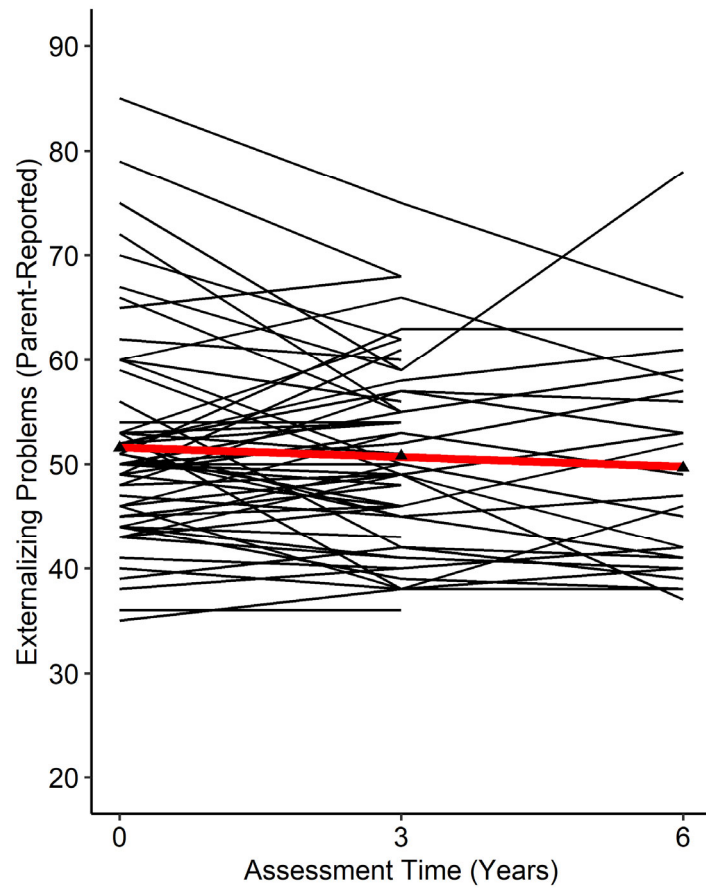

**Figure S1.** Individual developmental trajectories and estimated average change pattern of externalizing problems (parent-reported). Black lines represent individual trajectories. The red line represents the estimated average developmental trajectory ( $\beta = -0.19$ ,  $SE = 0.20$ ,  $p = 0.33$ ). Valid number of participants  $n = 86$  and valid number of observations  $k = 167$ .

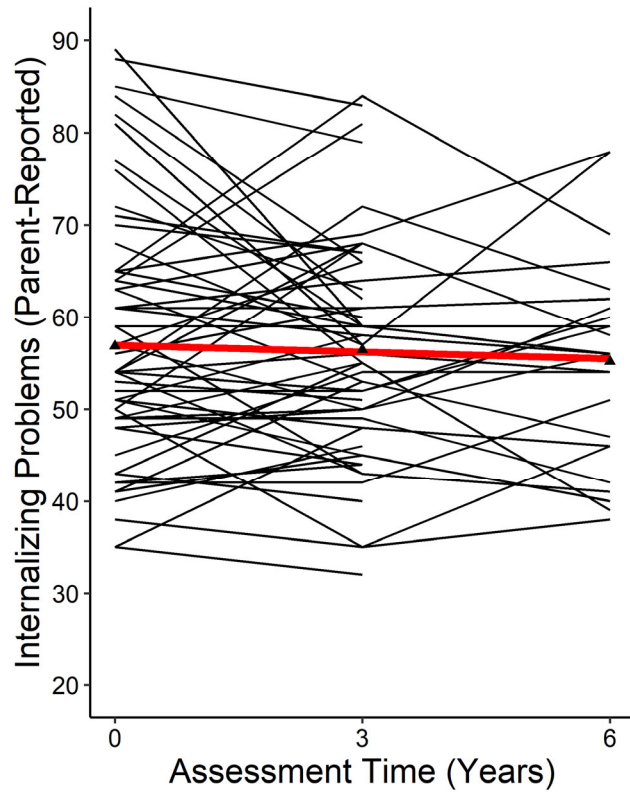

**Figure S2.** Individual developmental trajectories and estimated average change pattern of internalizing problems (parent-reported). Black lines represent individual trajectories. The red line represents the estimated average developmental trajectory ( $\beta = -0.06$ ,  $SE = 0.28$ ,  $p = 0.84$ ). Valid number of participants  $n = 86$  and valid number of observations  $k = 167$ .

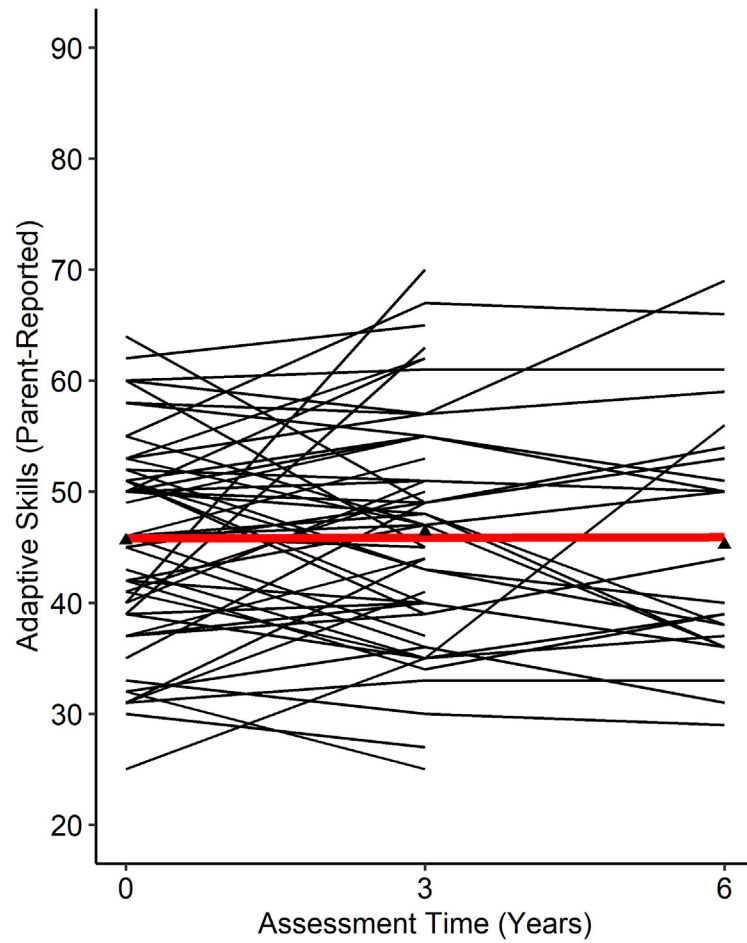

**Figure S3.** Individual developmental trajectories and estimated average change pattern of adaptive skills (parent-reported). Black lines represent individual trajectories. The red line represents the estimated average developmental trajectory ( $\beta = 0.27$ ,  $SE = 0.31$ ,  $p = 0.39$ ). Valid number of participants  $n = 86$  and valid number of observations  $k = 167$ .

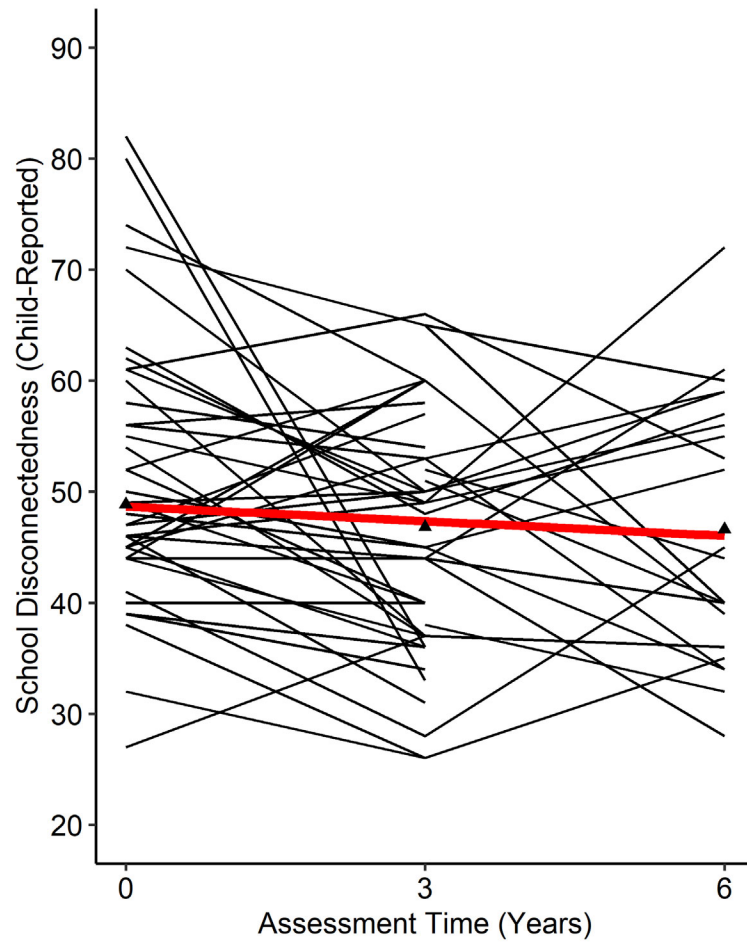

**Figure S4.** Individual developmental trajectories and estimated average change pattern of school disconnectedness (child-reported). Black lines represent individual trajectories. The red line represents the estimated average developmental trajectory ( $\beta = -0.68$ ,  $SE = 0.39$ ,  $p = 0.09$ ). Valid number of participants  $n = 81$  and valid number of observations  $k = 142$ .

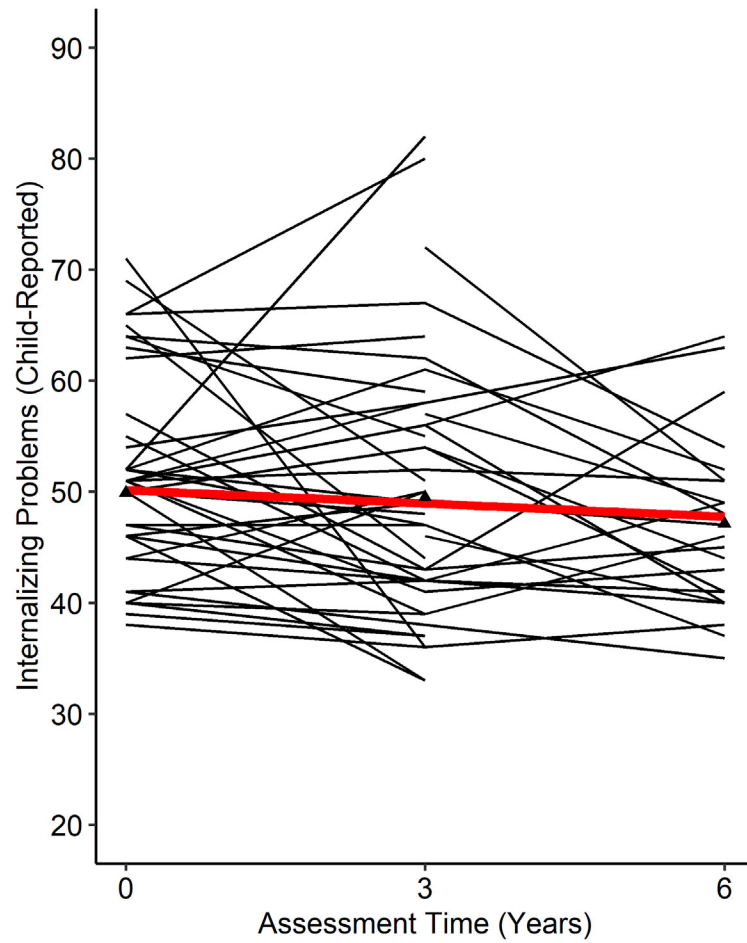

**Figure S5.** Individual developmental trajectories and estimated average change pattern of internalizing problems (child-reported). Black lines represent individual trajectories. The red line represents the estimated average developmental trajectory ( $\beta = -0.53$ ,  $SE = 0.30$ ,  $p = 0.08$ ). Valid number of participants  $n = 82$  and valid number of observations  $k = 146$ .

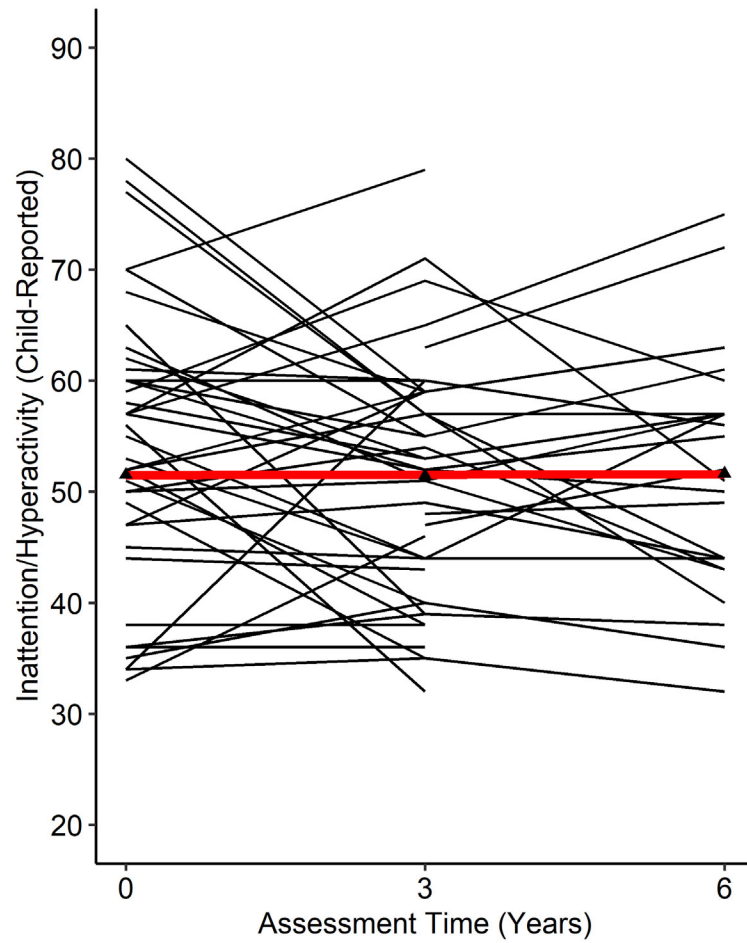

**Figure S6.** Individual developmental trajectories and estimated average change pattern of inattention/hyperactivity (child-reported). Black lines represent individual trajectories. The red line represents the estimated average developmental trajectory ( $\beta = -0.30$ ,  $SE = 0.32$ ,  $p = 0.36$ ). Valid number of participants  $n = 83$  and valid number of observations  $k = 147$ .

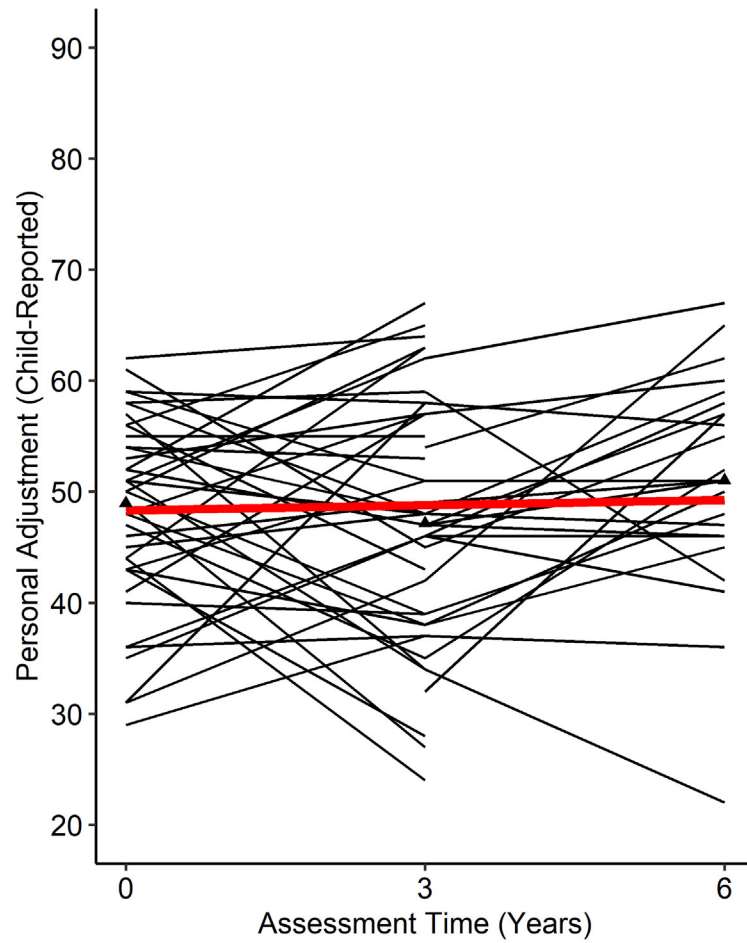

**Figure S7.** Individual developmental trajectories and estimated average change pattern of personal adjustment (child-reported). Black lines represent individual trajectories. The red line represents the estimated average developmental trajectory ( $\beta = 0.30$ ,  $SE = 0.37$ ,  $p = 0.90$ ). Valid number of participants  $n = 82$  and valid number of observations  $k = 146$ .

**Table S1.** Multilevel Modeling Coefficients of Predictors of Socioemotional Outcomes in the Separate Models.

|                      | Externalizing Problems (PR) |      | Internalizing Problems (PR) |      | Adaptive Skills (PR) |      | School Disconnectedness (CR) |      | Internalizing Problems (CR) |      | Inattention/Hyperactivity (CR) |      | Personal Adjustment (CR) |      |
|----------------------|-----------------------------|------|-----------------------------|------|----------------------|------|------------------------------|------|-----------------------------|------|--------------------------------|------|--------------------------|------|
| Parameters           | $\beta$                     | SE   | $\beta$                     | SE   | $\beta$              | SE   | $\beta$                      | SE   | $\beta$                     | SE   | $\beta$                        | SE   | $\beta$                  | SE   |
| Intercept            | 51.39***                    | 1.00 | 56.93***                    | 1.24 | 45.66***             | 1.04 | 49.68***                     | 1.30 | 50.20***                    | 1.16 | 51.80***                       | 1.28 | 48.16***                 | 1.21 |
| Time                 | -0.30                       | 0.23 | -0.59*                      | 0.30 | 0.45                 | 0.33 | -0.77                        | 0.44 | -0.62                       | 0.34 | -0.53                          | 0.35 | 0.28                     | 0.38 |
| Age                  | -0.44                       | 0.29 | 0.81*                       | 0.36 | 0.23                 | 0.30 | -1.33**                      | 0.43 | 0.03                        | 0.37 | -0.40                          | 0.41 | 0.00                     | 0.40 |
| Time $\times$ Age    | -0.05                       | 0.08 | -0.38***                    | 0.10 | 0.14                 | 0.10 | 0.27                         | 0.16 | -0.07                       | 0.12 | -0.09                          | 0.13 | -0.02                    | 0.13 |
| Intercept            | 52.77***                    | 1.55 | 58.79***                    | 1.91 | 43.37***             | 1.56 | 47.68***                     | 1.97 | 51.16***                    | 1.74 | 53.41***                       | 1.93 | 49.46***                 | 1.79 |
| Time                 | -0.69*                      | 0.32 | -0.48                       | 0.46 | 0.68                 | 0.50 | -0.79                        | 0.65 | -0.56                       | 0.49 | -0.84                          | 0.51 | 0.03                     | 0.54 |
| Male                 | -2.33                       | 2.05 | -3.73                       | 2.52 | 3.99                 | 2.06 | 1.94                         | 2.62 | -1.61                       | 2.29 | -3.11                          | 2.56 | -2.29                    | 2.38 |
| Time $\times$ Male   | 0.80*                       | 0.40 | 0.70                        | 0.57 | -0.70                | 0.64 | 0.13                         | 0.82 | 0.06                        | 0.63 | 0.88                           | 0.65 | 0.47                     | 0.69 |
| Intercept            | 51.43***                    | 1.01 | 56.61***                    | 1.23 | 45.68                | 1.02 | 48.78***                     | 1.29 | 50.28***                    | 1.13 | 51.70***                       | 1.27 | 48.12***                 | 1.16 |
| Time                 | -0.18                       | 0.19 | -0.04                       | 0.27 | 0.23                 | 0.30 | -0.66                        | 0.38 | -0.55                       | 0.30 | -0.31                          | 0.32 | 0.32                     | 0.34 |
| Pedu                 | -0.21                       | 0.42 | -1.18*                      | 0.51 | 0.86*                | 0.42 | 0.41                         | 0.56 | 0.24                        | 0.49 | 0.54                           | 0.55 | -0.53                    | 0.50 |
| Time $\times$ Pedu   | 0.26*                       | 0.10 | 0.40**                      | 0.15 | -0.32*               | 0.15 | -0.42*                       | 0.21 | -0.23                       | 0.16 | -0.15                          | 0.17 | 0.34                     | 0.18 |
| Intercept            | 52.81***                    | 2.07 | 58.33***                    | 2.56 | 42.43***             | 2.07 | 50.19***                     | 2.62 | 50.92***                    | 2.29 | 54.53***                       | 2.59 | 49.38***                 | 2.35 |
| Time                 | -1.04*                      | 0.44 | -1.02                       | 0.63 | 1.61*                | 0.64 | -2.03*                       | 0.92 | -1.16                       | 0.74 | -1.48                          | 0.78 | -1.26                    | 0.82 |
| White                | -1.78                       | 2.38 | -2.19                       | 2.94 | 4.24                 | 2.37 | -1.75                        | 3.02 | -0.83                       | 2.64 | -3.71                          | 2.97 | -1.43                    | 2.70 |
| Time $\times$ White  | 1.04*                       | 0.49 | 1.19                        | 0.70 | -1.74*               | 0.72 | 1.63                         | 1.01 | 0.74                        | 0.81 | 1.40                           | 0.85 | 1.85*                    | 0.89 |
| Intercept            | 50.72***                    | 1.21 | 55.45***                    | 1.49 | 45.88***             | 1.25 | 49.64***                     | 1.58 | 50.95***                    | 1.37 | 51.85***                       | 1.53 | 46.22***                 | 1.40 |
| Time                 | -0.06                       | 0.23 | 0.02                        | 0.33 | 0.40                 | 0.37 | -0.91*                       | 0.46 | -0.62                       | 0.36 | -0.49                          | 0.38 | 0.65                     | 0.39 |
| SINGLP               | 2.38                        | 2.21 | 3.99                        | 2.71 | -0.81                | 2.27 | -2.72                        | 2.80 | -2.25                       | 2.43 | -0.65                          | 2.74 | 6.18*                    | 2.49 |
| Time $\times$ SINGLP | -0.51                       | 0.45 | -0.26                       | 0.64 | -0.47                | 0.72 | 0.79                         | 0.88 | 0.26                        | 0.68 | 0.70                           | 0.72 | -1.13                    | 0.74 |

*Note.*  $\beta$  = regression coefficients in multilevel growth models; SE = standard error; Pedu = parental education; SINGLP = single parent; NF1 = Neurofibromatosis type 1; PNF1 = parental NF1 status; Visi = visibility of tumors; Seve = severity of NF1 symptoms; Comp = NF1-related disease complications; PR = parent-reported; CR = child-reported. \*  $p \leq .05$ ; \*\*  $p < .01$ ; \*\*\*  $p < .001$ . Valid number of participants ( $n$ ) and valid number of observations ( $k$ ) for the seven models were: externalizing problems (PR),  $n = 86$ ,  $k = 167$ ; internalizing problems (PR),  $n = 86$ ,  $k = 167$ ; adaptive skills (PR),  $n = 86$ ,  $k = 167$ ; school disconnectedness (CR),  $n = 81$ ,  $k = 142$ ; internalizing problems (CR),  $n = 82$ ,  $k = 146$ ; inattention/hyperactivity (CR),  $n = 83$ ,  $k = 147$ ; personal adjustment (CR),  $n = 82$ ,  $k = 146$ .



**Table S1 (Continued)**

| Parameters         | Externalizing Problems (PR) |      | Internalizing Problems (PR) |      | Adaptive Skills (PR) |      | School Disconnectedness (CR) |      | Internalizing Problems (CR) |      | Inattention/Hyperactivity (CR) |      | Personal Adjustment (CR) |      |
|--------------------|-----------------------------|------|-----------------------------|------|----------------------|------|------------------------------|------|-----------------------------|------|--------------------------------|------|--------------------------|------|
|                    | $\beta$                     | SE   | $\beta$                     | SE   | $\beta$              | SE   | $\beta$                      | SE   | $\beta$                     | SE   | $\beta$                        | SE   | $\beta$                  | SE   |
| Intercept          | 49.81***                    | 1.47 | 55.51***                    | 1.84 | 46.78***             | 1.52 | 48.07***                     | 1.90 | 48.73***                    | 1.62 | 51.23***                       | 1.79 | 48.09***                 | 1.71 |
| Time               | -0.07                       | 0.26 | 0.22                        | 0.36 | 0.29                 | 0.41 | -0.94                        | 0.52 | -0.43                       | 0.40 | -0.41                          | 0.42 | 0.72                     | 0.45 |
| PNF1               | 3.58                        | 2.16 | 3.74                        | 2.71 | -2.29                | 2.23 | 1.92                         | 2.79 | 4.43                        | 2.42 | 1.51                           | 2.65 | -1.42                    | 2.51 |
| Time $\times$ PNF1 | -0.29                       | 0.42 | -0.79                       | 0.58 | 0.08                 | 0.64 | 0.78                         | 0.83 | -0.36                       | 0.65 | 0.22                           | 0.67 | -0.82                    | 0.71 |
| Intercept          | 51.35***                    | 1.55 | 54.24***                    | 1.89 | 48.65***             | 1.53 | 45.68***                     | 1.99 | 48.18***                    | 1.73 | 50.95***                       | 1.97 | 47.73***                 | 1.84 |
| Time               | 0.09                        | 0.29 | 0.19                        | 0.41 | -0.71                | 0.45 | 0.17                         | 0.56 | -0.39                       | 0.46 | -0.06                          | 0.49 | 0.40                     | 0.51 |
| Visi               | 0.17                        | 2.05 | 4.24                        | 2.51 | -5.30*               | 2.02 | 5.31*                        | 2.60 | 3.52                        | 2.27 | 1.20                           | 2.58 | 0.75                     | 2.40 |
| Time $\times$ Visi | -0.52                       | 0.40 | -0.44                       | 0.56 | 1.74**               | 0.60 | -1.54*                       | 0.77 | -0.24                       | 0.61 | -0.44                          | 0.65 | -0.16                    | 0.68 |
| Intercept          | 51.15***                    | 1.78 | 49.75***                    | 2.06 | 49.32***             | 1.76 | 49.03***                     | 2.27 | 47.72***                    | 1.95 | 50.49***                       | 2.22 | 48.31***                 | 2.06 |
| Time               | 0.32                        | 0.34 | 0.65                        | 0.47 | -0.66                | 0.55 | -0.32                        | 0.65 | -0.44                       | 0.52 | 0.10                           | 0.55 | 0.92                     | 0.57 |
| Seve               | 0.46                        | 2.17 | 10.25***                    | 2.51 | -5.47*               | 2.15 | -0.35                        | 2.77 | 3.72                        | 2.38 | 1.74                           | 2.71 | -0.15                    | 2.51 |
| Time $\times$ Seve | -0.77                       | 0.41 | -1.08                       | 0.58 | 1.34*                | 0.66 | -0.56                        | 0.81 | -0.14                       | 0.64 | -0.61                          | 0.68 | -0.92                    | 0.70 |
| Intercept          | 51.42***                    | 1.00 | 56.71***                    | 1.22 | 45.64                | 1.04 | 48.75***                     | 1.30 | 50.23***                    | 1.13 | 51.63***                       | 1.26 | 48.14***                 | 1.18 |
| Time               | -0.15                       | 0.19 | -0.04                       | 0.28 | 0.24                 | 0.31 | -0.67                        | 0.39 | -0.52                       | 0.31 | -0.30                          | 0.32 | 0.34                     | 0.33 |
| Comp               | -0.07                       | 0.59 | 1.96**                      | 0.71 | -0.23                | 0.61 | -0.71                        | 0.75 | 0.70                        | 0.65 | 0.78                           | 0.73 | 0.51                     | 0.69 |
| Time $\times$ Comp | -0.37**                     | 0.13 | -0.34                       | 0.18 | 0.25                 | 0.20 | -0.01                        | 0.25 | -0.14                       | 0.20 | -0.04                          | 0.21 | -0.28                    | 0.22 |

*Note.*  $\beta$  = regression coefficients in multilevel growth models; *SE* = standard error; Pedu = parental education; SINGLP = single parent; NF1 = Neurofibromatosis type 1; PNF1 = parental NF1 status; Visi = visibility of tumors; Seve = severity of NF1 symptoms; Comp = NF1-related disease complications; PR = parent-reported; CR = child-reported. \*  $p \leq .05$ ; \*\*  $p < .01$ ; \*\*\*  $p < .001$ . Valid number of participants ( $n$ ) and valid number of observations ( $k$ ) for the seven models were: externalizing problems (PR),  $n = 86$ ,  $k = 167$ ; internalizing problems (PR),  $n = 86$ ,  $k = 167$ ; adaptive skills (PR),  $n = 86$ ,  $k = 167$ ; school disconnectedness (CR),  $n = 81$ ,  $k = 142$ ; internalizing problems (CR),  $n = 82$ ,  $k = 146$ ; inattention/hyperactivity (CR),  $n = 83$ ,  $k = 147$ ; personal adjustment (CR),  $n = 82$ ,  $k = 146$ .

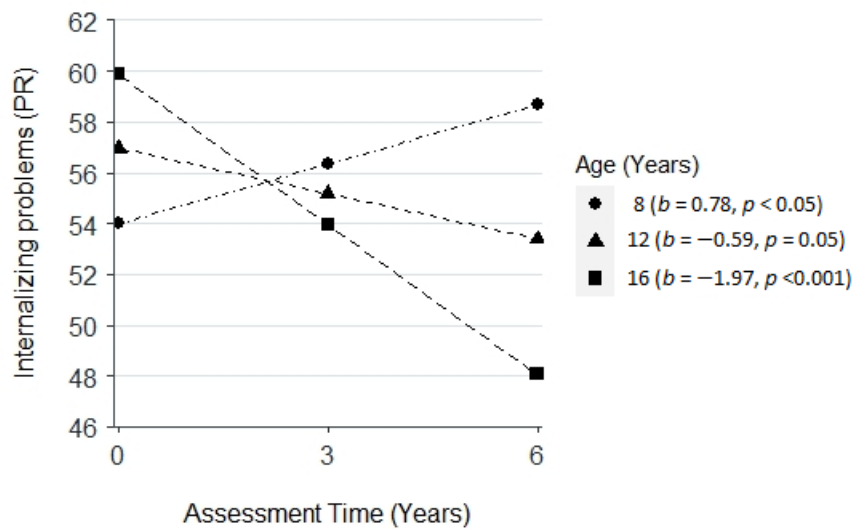

**Figure S8.** Plot for the interaction effect among assessment time and age at baseline on internalizing problems (parent-reported, PR). Three levels of baseline age were plotted: 8 years (1 SD below the mean), 12 years (the mean), and 16 years (1 SD above the mean).

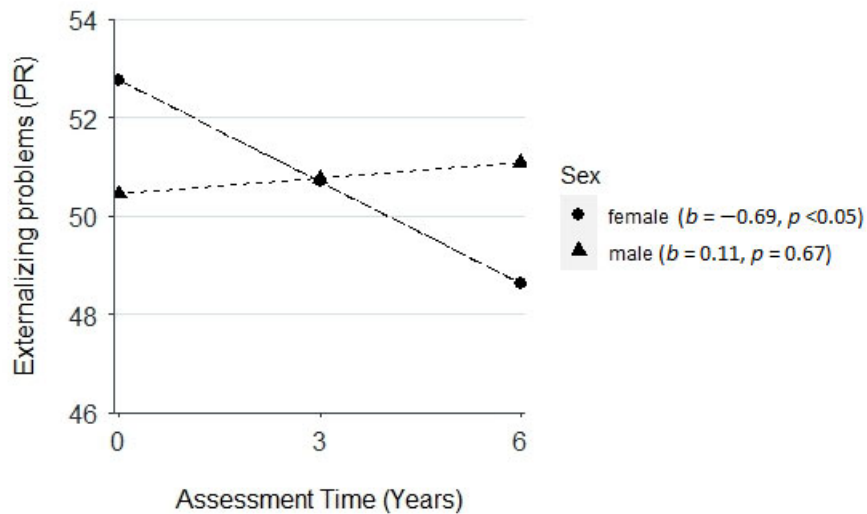

**Figure S9.** Plot for the interaction effect among assessment time and sex on externalizing problems (parent-reported, PR).

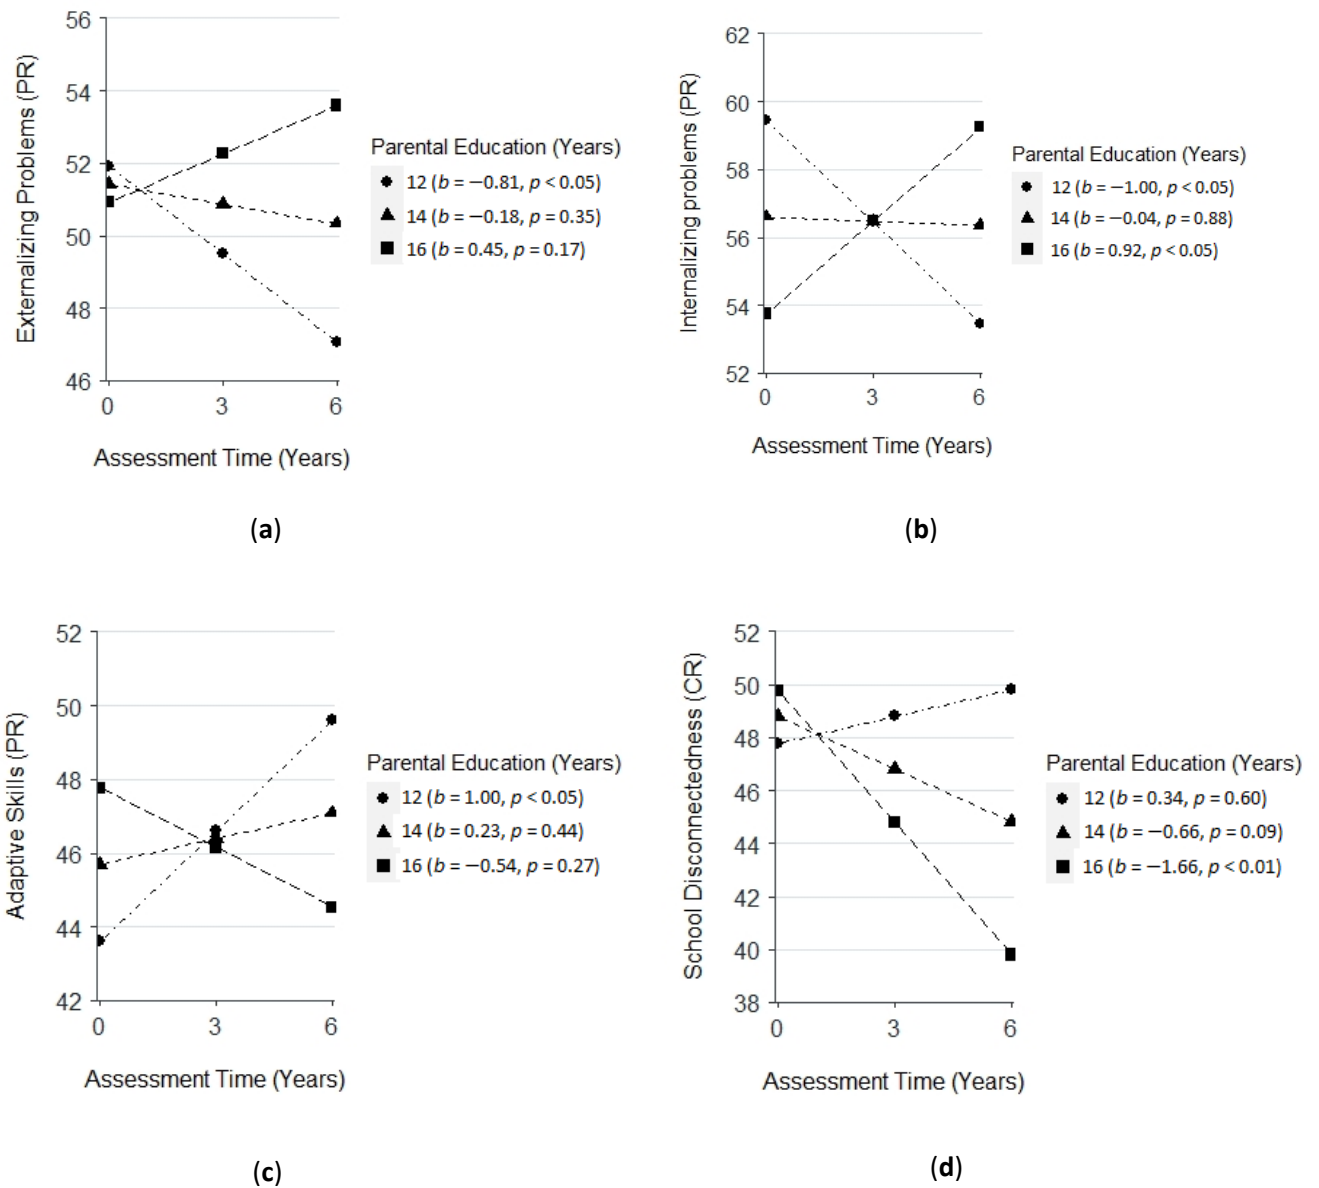

**Figure S10.** Plot for the interaction effect among assessment time and parental education on (a) externalizing problems (parent-reported, PR), (b) internalizing problems (parent-reported, PR), (c) adaptive skills (parent-reported, PR), (d) school disconnectedness (child-reported, CR). Three levels of parental education were plotted: 12 years (1 SD below the mean), 14 years (the mean), and 16 years (1 SD above the mean).

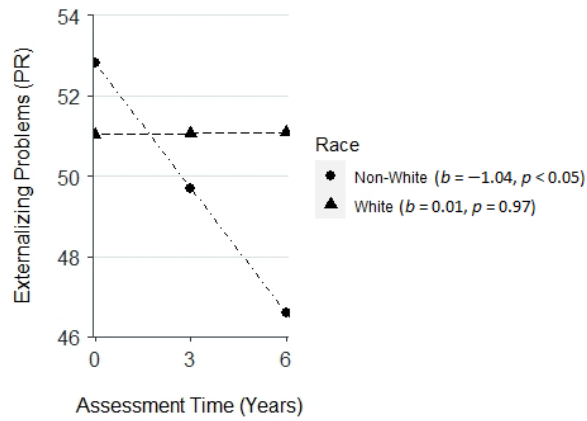

(a)

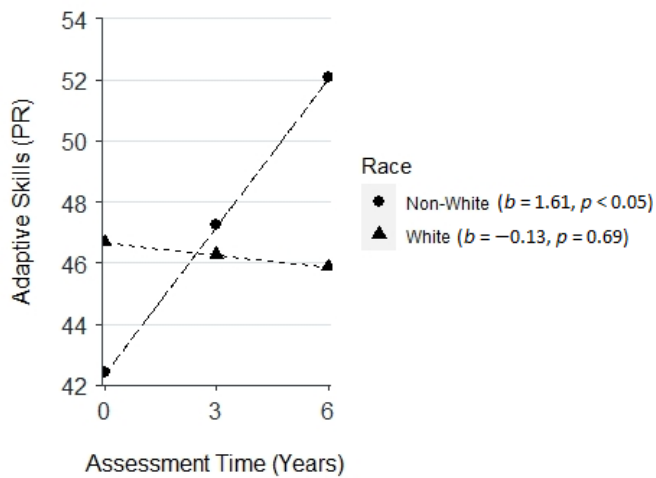

(b)

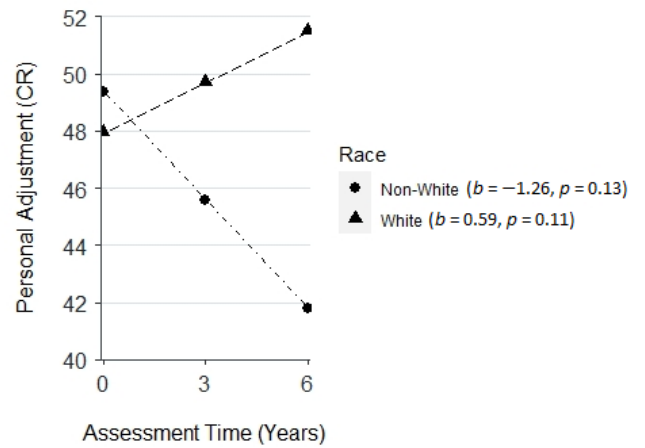

(c)

**Figure S11.** Plot for the interaction effect among assessment time and race on (a) externalizing problems (parent-reported, PR), (b) adaptive skills (parent-reported, PR), (c) personal adjustment (child-reported, CR).

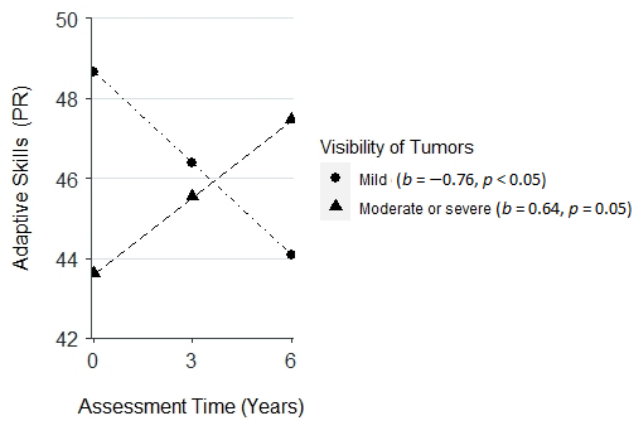

(a)

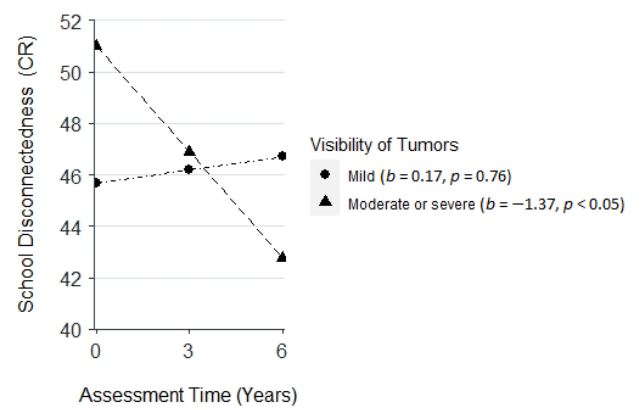

(b)

**Figure S12.** Plot for the interaction effect among assessment time and visibility of tumors on (a) adaptive skills (parent-reported, PR), (b) school disconnectedness (child-reported, CR).

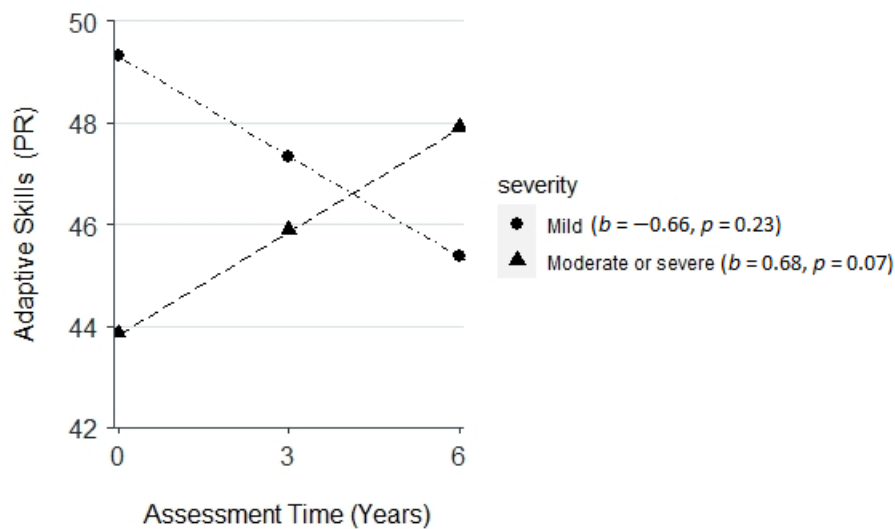

**Figure S13.** Plot for the interaction effect among assessment time and NF1 disease severity on adaptive skills (parent-reported, PR).

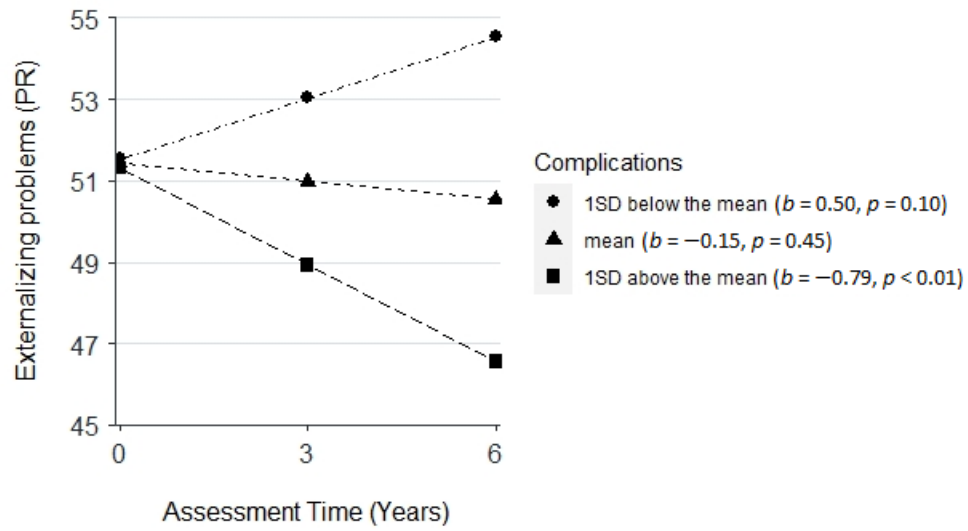

**Figure S14.** Plot for the interaction effect among assessment time and NF1-related disease complications on externalizing problems (parent-reported, PR).
